# Supplementary material for: Invasive Fungal Infections Complicating COVID-19: A Narrative Review
Source: MDPI journal article supplement (doi:10.3390/jof7110921), 2021-10-29
Supplement: s1 [file s1]

**Table S1. Case report and case series describing CAPA.**

| Author/<br>Country/<br>Algorithm         | No. cases/<br>Definition | Sex/Age | Underlying<br>diseases                             | Steroid /<br>Target<br>therapy<br>COVID-19 | Days from<br>ICU/TI<br>to CAPA<br>(IQR) | Sample/<br><i>Aspergillus</i> spp.    | GM (ODI)<br>index<br>Serum/<br>respiratory<br>specimen | <i>Aspergillus</i><br>PCR in<br>serum/<br>respiratory<br>specimen | Positive<br>BDG | Specific<br>imaging<br>findings | Antifungals          | Outcome |
|------------------------------------------|--------------------------|---------|----------------------------------------------------|--------------------------------------------|-----------------------------------------|---------------------------------------|--------------------------------------------------------|-------------------------------------------------------------------|-----------------|---------------------------------|----------------------|---------|
| Trovato [65]/<br>Italy/<br>NR            | 1/NR                     | M/77    | AH, DM                                             | Steroid                                    | 16                                      | BAS/A. <i>niger</i><br>Positive DE    | 4.9/-                                                  | -/Pos (BAS)                                                       | Yes             | No                              | Voriconazole         | Dead    |
| Benedetti [66]/<br>Argentina/<br>mAspICU | 5/ Probable              | M/23    | ALL                                                | Steroid                                    | 6                                       | TA/Neg                                | 0.9/4.2 (TA)                                           | -                                                                 | -               | Nodules                         | Voriconazole         | Dead    |
|                                          | Probable                 | M/57    | None                                               | Steroid                                    | 3                                       | Sputum/<br><i>A. fumigatus</i>        | 0.92/-                                                 | -                                                                 | -               | No                              | AMB                  | Alive   |
|                                          | Probable                 | M/44    | DM, AH,<br>Obesity                                 | Steroid                                    | 32                                      | TA/Neg                                | 1.01/-                                                 | -                                                                 | -               | Nodules                         | Voriconazole         | Alive   |
|                                          | Probable                 | M/69    | DM                                                 | Steroid                                    | 6                                       | TA/A. <i>fumigatus</i><br>Positive DE | 2.15/Neg (TA)                                          | -                                                                 | -               | -                               | Voriconazole         | Alive   |
|                                          | Probable                 | F/69    | DM, AH                                             | Steroid                                    | 13                                      | TA/A. <i>fumigatus</i>                | 0.57/3.17 (TA)                                         | -                                                                 | -               | -                               | Voriconazole         | Alive   |
| Iwanaga [67]/<br>Japan/<br>NR            | 1/NR                     | M/79    | Polymyalgia<br>rheumatica<br>(chronic<br>steroids) | Steroid                                    | 23*                                     | TA/A. <i>fumigatus</i><br>Positive DE | -                                                      | -                                                                 | -               | Nodules                         | AMB                  | Dead    |
| Lahmer [68]/<br>Germany/<br>NR           | 2/NR                     | M/80    | CPD                                                | -                                          | 5                                       | BAL/<br><i>A. fumigatus</i>           | 1.5/6.3 (BAL)                                          | -                                                                 | -               | No                              | AMB                  | Dead    |
|                                          | NR                       | M/70    | No                                                 | -                                          | 6                                       | BAL/<br><i>A. fumigatus</i>           | Neg/6.1 (BAL)                                          | -                                                                 | -               | No                              | AMB                  | Dead    |
| Antinori [69]/<br>Italy/<br>NR           | 1/ Proven<br>(autopsy)   | M/73    | Obesity, AH,<br>DM, CVD                            | No                                         | 4                                       | BAS/<br><i>A. fumigatus</i>           | 8.6/-                                                  | -                                                                 | -               | No                              | Isavuconazole<br>AMB | Dead    |
| Prattes [70]/<br>Austria/<br>NR          | 1/NR                     | M/70    | AH, DM,<br>CVD, CPD<br>(chronic<br>steroids)       | -                                          | 2                                       | TA/A. <i>fumigatus</i>                | Neg/-                                                  | -                                                                 | Neg             | Halo sign                       | Voriconazole         | Dead    |
| Blaize [71]/<br>France/<br>AspICU        | 1/Putative               | M/74    | AH, MDS                                            | -                                          | 4                                       | TA/A. <i>fumigatus</i><br>Positive DE | Neg/Neg (TA)                                           | Neg/Pos<br>(TA)                                                   | Neg             | No                              | No                   | Dead    |
| Santana [72]/<br>Brazil/<br>NR           | 1/Proven<br>(autopsy)    | M/71    | AH, DM                                             | -                                          | -                                       | Autopsy/<br><i>A. penicillioides</i>  | -                                                      | -                                                                 | -               | Nodule                          | No                   | Dead    |
| Helleberg [73]/<br>Denmark/<br>AspICU    | 2/ Putative              | F/63    | AH                                                 | No                                         | 5                                       | TA/A. <i>fumigatus</i>                | 1.1/8.2 (BAL)                                          | -                                                                 | -               | No                              | Voriconazole         | Dead    |
|                                          | Putative                 | F/53    | CPD                                                | Steroids                                   | 1                                       | TA/A. <i>fumigatus</i>                | Neg/2.2 (TA)                                           | -                                                                 | -               | No                              | Voriconazole         | Dead    |
| Bruno [74]/<br>Italy/<br>mAspICU         | 1/Probable               | M/68    | No                                                 | TCZ                                        | 24                                      | BAL/<br><i>A. fumigatus</i>           | Neg/Pos (BAL)                                          | -                                                                 | -               | Cavity +<br>air crescent        | Voriconazole         | Alive   |

|                                                       |             |      |                                 |              |    |                                           |                      |            |       |                             |                      |       |
|-------------------------------------------------------|-------------|------|---------------------------------|--------------|----|-------------------------------------------|----------------------|------------|-------|-----------------------------|----------------------|-------|
| Mohamed[75]/<br>Ireland/<br>mAspICU                   | 1/Probable  | M/66 | Obesity, AH,<br>DM              | -            | 7  | TA/ <i>A. fumigatus</i>                   | 1.1/5.5 (TA)         | -          | Pos   | No                          | AMB                  | Dead  |
| Ghelfenstein<br>[76]/France/<br>AspICU                | 1/Putative  | M/56 | Obesity, DM,<br>CPD             | Eculizumab   | 7  | TA/<br><i>A. fumigatus</i><br>Positive DE | Neg/-                | -/Pos (TA) | Neg   | Nodule                      | No                   | Dead  |
| Fernandez<br>[77]/Argentina/<br>mAspICU               | 1/Probable  | M/85 | AH                              | Steroid      | 25 | TA/ <i>A. flavus</i>                      | 1.4/-                | -          | -     | No                          | Voriconazole<br>AMB  | Dead  |
| Schein [78]/<br>France/<br>EORTC pers. <sup>o</sup>   | 1/Probable  | F/87 | No                              | Steroid      | -  | TA/Neg                                    | 1.9/6.03<br>(sputum) | Pos/-      | -     | Nodule<br>Air-crescent      | Voriconazole         | Dead  |
| Abdalla [79]/<br>Qatar/<br>AspICU                     | 2/Putative  | M/58 | DM, AH, HBV                     | Steroid, TCZ | 5  | BAL/ <i>A. niger</i>                      | -                    | -          | -     | No                          | Anidulafungin<br>AMB | Dead  |
|                                                       | Putative    | M/74 | No                              | Steroid      | 18 | BAL/ <i>A. terreus</i>                    | -                    | -          | -     | No                          | Voriconazole         | Dead  |
| Patti <sup>oo</sup> [80]/<br>USA/<br>NR               | 1/NR        | M/73 | AH                              | Steroid      | -  | BAL/ <i>A. flavus</i>                     | Neg/-                | -          | -     | Cavity with<br>aspergilloma | Voriconazole         | Alive |
| Marr [81]/<br>USA/<br>mAspICU<br>pers. <sup>ooo</sup> | 20/Probable | F/71 | CPD, CKD                        | No           | 8  | BAS/<br><i>A. fumigatus</i>               | Neg/-                | -          | Pos   | Nodules                     | 18 treated           | Alive |
|                                                       | Probable    | F/56 | CPD, DM,<br>AH, CVD,<br>Obesity | No           | 2  | -                                         | Pos/-                | -          | -     | Nodules                     |                      | Alive |
|                                                       | Probable    | F/70 | AH                              | No           | 10 | -                                         | Pos/-                | -          | Pos   | -                           |                      | Dead  |
|                                                       | Probable    | F/68 | AH, dementia                    | No           | 2  | BAS/<br><i>A. fumigatus</i>               | Neg/-                | -          | -     | -                           |                      | Alive |
|                                                       | Probable    | M/69 | AH                              | No           | 12 | BAS/ <i>A. niger</i>                      | Neg/-                | -          | -     | No                          |                      | Dead  |
|                                                       | Probable    | M/55 | AH, CVD                         | No           | -1 | BAS/<br><i>A. fumigatus</i>               | Neg/-                | -          | Neg   | No                          |                      | Alive |
|                                                       | Probable    | F/85 | AH, DM,<br>CKD                  | No           | 9  | BAS/<br><i>A. fumigatus</i>               | Pos/-                | -          | Pos   | Nodules<br>Cavities         |                      | Alive |
|                                                       | Probable    | F/50 | CKD, CPD                        | TCZ          | 23 | BAS/<br><i>A. fumigatus</i>               | Neg/-                | -          | Pos   | -                           |                      | Alive |
|                                                       | Probable    | F/45 | CPD, SLE                        | Ocrelizumab  | 12 | BAS/<br><i>A. fumigatus</i>               | Neg/-                | -          | Pos.  | No                          |                      | Alive |
|                                                       | Probable    | F57  | DM                              | No           | 4  | BAS/<br><i>A. fumigatus</i>               | Neg/-                | -          | Neg   | -                           |                      | Alive |
|                                                       | Probable    | M/57 | Cancer                          | No           | 22 | BAS/<br><i>A. fumigatus</i>               | Neg/-                | -          | Inter | -                           |                      | Alive |
|                                                       | Probable    | M/61 | AH                              | No           | 16 | Neg                                       | Pos/-                | -          | Neg   | -                           |                      | Dead  |
|                                                       | Probable    | F/75 | AH, CPD,<br>DM, Obesity         | No           | 12 | BAS/<br><i>A. fumigatus</i>               | -                    | -          | -     | -                           |                      | Alive |
|                                                       | Probable    | F/56 | CPD                             | TCZ          | 2  | BAS/<br><i>A. fumigatus</i>               | Neg/-                | -          | -     | -                           |                      | Alive |
|                                                       | Probable    | M70  | AH                              | No           | 3  | BAS/<br><i>A. fumigatus</i> ,             | -                    | -          | -     | No                          |                      | Alive |

|                                      |                                   |      |                                       |                        |                  |                                                                     |                 |                  |     |                       |                               |       |
|--------------------------------------|-----------------------------------|------|---------------------------------------|------------------------|------------------|---------------------------------------------------------------------|-----------------|------------------|-----|-----------------------|-------------------------------|-------|
|                                      | Probable                          | M/76 | CPD                                   | Steroid                | 11               | <i>A. niger</i><br>BAS/<br><i>A. fumigatus</i> ,<br><i>A. niger</i> | Neg/-           | -                | -   | -                     |                               | Alive |
|                                      | Probable                          | M/73 | AH, DM                                | Steroid                | 7                | BAS/<br><i>Aspergillus</i>                                          | Neg/-           | -                | -   | No                    |                               | Alive |
|                                      | Probable                          | M/78 | AH                                    | Steroid,<br>siltuximab | 14               | BAS/<br><i>Aspergillus</i>                                          | -               | -                | -   | -                     |                               | Alive |
|                                      | Probable                          | F/56 | No                                    | TCA, anakinra          | 9                | BAL/ <i>A. terreus</i>                                              | -               | -                | -   | -                     |                               | Alive |
|                                      | Probable                          | M/81 | DM, AH,<br>cirrhosis                  | Steroid                | 24               | BAL/ <i>A. niger</i>                                                | Neg/Pos (BAL)   | -                | -   | Cavity                |                               | Alive |
| Trujillo [82]/<br>Spain/<br>EORTC    | 1/Probable                        | F/55 | AH, CKD,<br>SOT (chronic<br>steroids) | TCZ                    | 7                | Sputum/<br><i>A. fumigatus</i>                                      | Neg/-           | -                | Pos | Cavity<br>Tree-in-bud | Isavuconazole<br>AMB          | Alive |
| Shadrach [83]/<br>India/<br>AspICU   | 1/Putative                        | F/55 | Obesity                               | Steroid                | (post-<br>COVID) | BAL/<br><i>A. fumigatus</i>                                         | 1.2/4.7 (BAL)   | -                | -   | Nodule                | Voriconazole                  | Alive |
| Bellanger [84]/<br>France/<br>White  | 1/Putative                        | M/55 | Cancer, HSCT                          | Steroid                | 19               | BAL/<br><i>A. fumigatus</i>                                         | Neg/-           | Neg/Pos<br>(BAL) | -   | No                    | AMB                           | Dead  |
| Witting [85]/<br>USA/<br>NR          | 1/NR                              | M/72 | No                                    | TCZ                    | 14               | BAL/<br><i>Aspergillus</i>                                          | -/8.13 (BAL)    | -                | -   | Cavity<br>Fungus-ball | Voriconazole<br>Micafungin    | Alive |
| Haglund [86]/<br>Denmark/<br>mAspICU | 1/Probable                        | M/52 | Obesity, DM,<br>CVD                   | NA                     | 24               | BAL/<br><i>A. fumigatus</i><br>Positive DE                          | -/5.7 (BAL)     | -/Pos<br>(BAL)   | -   | -                     | Voriconazole                  | Alive |
| Hakamifard[87]/I<br>ran/<br>ECMM     | 1/Probable                        | M/35 | No                                    | Steroid                | 17               | BAL/<br><i>A. ochraceus</i><br>Positive DE                          | 2.1/-           | -                | -   | Nodule                | Voriconazole<br>AMB           | Dead  |
| Imoto [64]/<br>Japan/<br>mAspICU     | 1/Probable                        | M/72 | AH, CVD,<br>CPD, stroke               | Steroid                | 14               | TA/<br><i>A. fumigatus</i>                                          | 0.6/-           | -                | Pos | Nodule                | Voriconazole<br>Micafungin    | Dead  |
| Johnson [88]/<br>USA/<br>ECMM        | 1/Probable                        | M/79 | AH, DM                                | Steroid                | 14               | BAL/<br><i>A. fumigatus</i><br>Positive DE                          | 2.04/7.86 (BAL) | -                | Pos | Cavity                | Voriconazole                  | Alive |
| Kakamad [89]/<br>Iraq/<br>NR         | 1/Proven<br>(lobectomy)           | M/50 | DM                                    | NA                     | 21               | BAL/<br><i>Aspergillus</i><br>Positive DE                           | -               | -                | -   | Cavity                | Voriconazole<br>(+ surgery)   | Alive |
| Lescure [90]/<br>France/<br>NR       | 1/NR                              | M/80 | Cancer                                | No                     | -                | TA/ <i>A. flavus</i>                                                | -               | -                | -   | Cysts                 | Voriconazole<br>Isavuconazole | Alive |
| Nasrullah [91]/<br>USA/<br>AspICU    | 1/Putative                        | M/68 | AH, DM                                | Steroid                | -                | BAL/<br><i>A. fumigatus</i>                                         | Neg/2.16 (BAL)  | -                | Neg | No                    | Voriconazole                  | Dead  |
| Salehi [92]/<br>Iran/<br>NR          | 1/Proven<br>(Pulmonary<br>biopsy) | M/70 | No                                    | Steroid                | 37               | Biopsy/ <i>A. flavus</i><br><br>Positive DE                         | -               | -                | -   | Cavity<br>Halo-sign   | Voriconazole                  | Dead  |

|                                                 |                       |      |                          |                            |    |                                                     |               |       |   |    |                                |       |
|-------------------------------------------------|-----------------------|------|--------------------------|----------------------------|----|-----------------------------------------------------|---------------|-------|---|----|--------------------------------|-------|
| Sasoni [93]/<br>Argentina/<br>mAspICU-<br>IAPA  | 1/Probable            | M/73 | PTE                      | Steroid                    | 30 | Neg                                                 | 1.8/-         | Pos/- | - | No | Voriconazole<br>AMB            | Alive |
| Sharma [94]/<br>Austria/<br>NR                  | 1/NR                  | F/66 | AH                       | NA                         | 8  | TA/<br><i>A. fumigatus</i>                          | -             | -     | - | No | Voriconazole                   | Alive |
| Van Someren<br>Gréve [95]/<br>Netherland/<br>NR | 1/Proven<br>(autopsy) | M/79 | AH, DM,<br>CVD           | Steroid                    | 14 | BAL/<br><i>A. fumigatus</i>                         | 1.7/7.9 (BAL) | -     | - | No | Voriconazole<br>Anidulafungin  | Dead  |
| Abolghasemi<br>[96]/Iran/<br>NR                 | 1/NR                  | F/66 | No                       | Steroid                    | 15 | BAL/ <i>A. terreus</i><br><br>Positive DE           | 4.15/-        | -     | - | No | Voriconazole                   | Dead  |
| Steenwyk [97]/<br>USA/<br>NR                    | 1/NR                  | M/57 | No                       | -                          | -  | BAS/<br><i>A. fumigatus</i>                         | -             | -     | - | -  | Caspofungin                    | Dead  |
| Flikweert [98]/<br>Netherland/<br>IAPA          | 6/Probable            | F/73 | No                       | Steroid                    | 19 | BAL/<br><i>A. fumigatus</i>                         | -/4.4 (BAL)   | -     | - | No | Voriconazole<br>Anidulafungin  | Dead  |
|                                                 | Probable              | F/58 | No                       | Steroid                    | 20 | Neg                                                 | -/3.4 (BAL)   | -     | - | No | Voriconazole<br>Anidulafungin  | Dead  |
|                                                 | Probable              | M/68 | No                       | No                         | 1  | BAL/<br><i>A. fumigatus</i>                         | -/5.7 (BAL)   | -     | - | No | Voriconazole<br>Anidulafungin  | Dead  |
|                                                 | Probable              | M/78 | AH, CKD                  | Steroid                    | 20 | Neg                                                 | -/4.3 (BAL)   | -     | - | No | Voriconazole<br>Anidulafungin  | Dead  |
|                                                 | Probable              | M/83 | AH, DM                   | No                         | 11 | Neg                                                 | -/1.7 (BAL)   | -     | - | No | Voriconazole<br>Anidulafungin  | Dead  |
|                                                 | Probable              | M/74 | No                       | Steroid                    | 24 | Neg                                                 | -/4.4 (BAL)   | -     | - | No | Voriconazole<br>Anidulafungin  | Dead  |
| García<br>Clemente [99]/<br>Spain/<br>NR        | 2/NR                  | F/78 | Hyperparathy-<br>roidism | No                         | 4  | BAL/<br><i>A. fumigatus</i> +<br><i>A. nidulans</i> | -/Pos (BAL)   | -     | - | No | Voriconazole                   | Alive |
|                                                 | NR                    | M/83 | AH, CVD,<br>CKD          | No                         | -  | BAS/<br><i>A. fumigatus</i>                         | -/Pos (BAS)   | -     | - | No | AMB<br>Voriconazole            | Alive |
| Nasri [100]/<br>Iran/<br>EORTC                  | 1/Probable            | F/42 | AML                      | No                         | 9  | Neg                                                 | 4/-           | -     | - | No | AMB                            | Dead  |
| Martin C.S.<br>[101]/Spain/<br>AspICU           | 3/Putative            | M/71 | AH                       | Steroid<br>TCZ<br>Anakinra | 19 | BAL/<br><i>A. fumigatus</i>                         | -/1.4 (BAL)   | -     | - | No | Anidulafungin<br>Isavuconazole | Alive |
|                                                 | Putative              | M/73 | AH, DM                   | Steroid                    | 25 | BAL/<br><i>A. fumigatus</i>                         | -/1.4 (BAL)   | -     | - | No | Isavuconazole                  | Alive |
|                                                 | Putative              | F/67 | No                       | Steroid                    | 27 | BAL/<br><i>A. fumigatus</i>                         | -/1.5 (BAL)   | -     | - | No | AMB<br>Isavuconazole           | Dead  |
|                                                 | 2/NR                  | 40   | No                       | Steroid                    | 25 | BAL/                                                | -             | -     | - | No | Voriconazole                   | Dead  |

|                                 |    |    |                |                |    |                                                          |       |   |   |        |     |      |
|---------------------------------|----|----|----------------|----------------|----|----------------------------------------------------------|-------|---|---|--------|-----|------|
| Alobaid [102]<br>/Kuwait/<br>NR | NR | 60 | DM, AH,<br>CVD | TCZ<br>Steroid | 26 | <i>A. niger</i><br>Positive DE<br>TA/<br><i>A. niger</i> | 6.5/- | - | - | Cavity | AMB | Dead |
|---------------------------------|----|----|----------------|----------------|----|----------------------------------------------------------|-------|---|---|--------|-----|------|

Data are absolute number (percentage) unless otherwise specified.

**Abbreviations.** DE, direct examination of respiratory sample showing septate branching hyphae; AH, arterial hypertension; DM; diabetes mellitus; CVD, cardiovascular disease; CPD, chronic pulmonary disease; SOT, solid organ transplant; HSCT, haematopoietic stem cell transplant; CML, chronic myeloid leukaemia; MDS, myelodysplastic syndrome; CKD, chronic kidney disease; AML, acute myeloid leukaemia; ALL, acute lymphoblastic leukaemia; AS, ankylosing spondylitis; CLL, chronic lymphocytic leukaemia; PTE, pulmonary thromboembolism; HBV, hepatitis B virus; UC, ulcerative colitis; TCZ, tocilizumab; SLE, systemic lupus erythematosus; BAL, bronchial-alveolar lavage; BAS, bronchial aspirate; TA, tracheal aspirate; RS, respiratory specimen; NR, not reported; ODI, optical density index; TI, tracheal intubation; BDG, (1-3)- $\beta$ -D-glucan; AMB: amphotericin B.

\* Days from hospital admission to CAPA.

\*\* Days from COVID-diagnosis to CAPA.

\*\*\* *Asp*ICU, IAPA and EORTC.

° EORTC + serology with ELISA and WesternBlot assay.

°° Case of subacute aspergillosis with fungus ball on CT scan.

°°° Cases were defined as recovery of *Aspergillus* species from respiratory fluids (tracheobronchial secretions, sputum, BAL) or positive (index  $\geq 1$ ) serum or BAL markers, identified with work-up for possible secondary pneumonia, typically clinically indicated with new fever or respiratory decompensation with new focal infiltrates on chest radiograph or computed tomography scan.

^ Age is expressed as median (Inter-quartile range)

Results for a  $\beta$ -D-glucan assay were reported when available but did not suffice to establish case diagnosis.
