# Supplementary material for: Invasive Fungal Infections Complicating COVID-19: A Narrative Review
Source: MDPI journal article supplement (doi:10.3390/jof7110921), 2021-10-29
Supplement: s1 [file s1]

**Table S4. Case report/series describing candidemia and yeast fungemia associated with COVID-19.**

| Author/<br>Country               | Cases | Sex/<br>Age | Underlying<br>conditions                     | Steroid/<br>Target<br>therapies<br>COVID-19 | Days from<br>ICU/TI to<br>Candidemia<br>(IQR) | CVC | TPN | ATB | IMV     | <i>Candida</i> species                       | Secondary focus                 | Antifungals                                             | Outcome |
|----------------------------------|-------|-------------|----------------------------------------------|---------------------------------------------|-----------------------------------------------|-----|-----|-----|---------|----------------------------------------------|---------------------------------|---------------------------------------------------------|---------|
| Al-Hatmi<br>[108]/<br>Oman       | 5     | M/76        | No                                           | No                                          | -                                             | Yes | No  | Yes | Yes     | <i>C. albicans</i>                           | No                              | No                                                      | Dead    |
|                                  |       | M/68        | AH                                           | No                                          | -                                             | Yes | No  | Yes | Yes     | <i>C. albicans</i>                           | No                              | Yes (Caspofungin 2,<br>Caspo + AMB 1, Caspo<br>+ Vor 1) | Dead    |
|                                  |       | M/38        | AH, CVD                                      | No                                          | -                                             | Yes | No  | Yes | Yes     | <i>C. albicans</i>                           | No                              | Yes                                                     | Dead    |
|                                  |       | M/64        | AH                                           | No                                          | -                                             | Yes | No  | Yes | Yes     | <i>C. albicans</i> ,<br><i>C. tropicalis</i> | No                              | Yes                                                     | Alive   |
|                                  |       | M/49        | No                                           | No                                          | -                                             | Yes | No  | Yes | Yes     | <i>C. albicans</i>                           | No                              | Yes                                                     | Alive   |
| Antinori [109]/<br>Italy         | 3     | M/67        | CVD                                          | TCZ                                         | 13                                            | Yes | Yes | Yes | Yes     | <i>C. albicans</i>                           | Endophtalmitis,<br>endocarditis | Caspofungin<br>Fluconazole                              | Alive   |
|                                  |       | M/58        | AH                                           | TCZ                                         | 17                                            | No  | Yes | No  | No      | <i>C. tropicalis</i>                         | No                              | Caspofungin                                             | Alive   |
|                                  |       | M/78        | DM, Obesity                                  | TCZ                                         | 14                                            | Yes | Yes | Yes | No      | <i>C. parapsilosis</i>                       | No                              | Caspofungin<br>Fluconazole                              | Alive   |
| Khatib [110]/<br>Qatar           | 1     | M/60        | Obesity,<br>AH, DM,<br>CVD                   | Steroids<br>TCZ                             | 30                                            | Yes | Yes | Yes | Yes     | <i>C. parapsilosis</i>                       | No                              | Anidulafungin                                           | Dead    |
| Alataby [111]/<br>USA            | 1     | M/67        | Obesity, AH,<br>DM, CPD, CKD,<br>HCV, plegia | Steroids<br>BAR                             | -                                             | Yes | No  | Yes | Yes     | <i>C. dubliniensis</i>                       | No                              | Micafungin<br>Fluconazole                               | Alive   |
| Allaw [112]/<br>Lebanon          | 2     | M/75        | Cancer                                       | Yes                                         | 40                                            | Yes | -   | Yes | Yes     | <i>C. auris</i>                              | No                              | Yes                                                     | Alive   |
|                                  |       | M/66        | Cancer                                       | Steroids                                    | 62                                            | Yes | -   | Yes | Yes     | <i>C. auris</i>                              | No                              | Yes                                                     | Dead    |
| Bhagali [113]/<br>India          | 1     | M/42        | AH, DM                                       | Steroids<br>TCZ                             | -                                             | -   | -   | -   | Yes     | <i>C. albicans</i>                           | Retinitis                       | Yes                                                     | Alive   |
| Nobrega d.A.<br>[114]/<br>Brazil | 3     | F/74        | DM, AH,<br>CKD, CVD                          | -                                           | 34                                            | Yes | No  | Yes | Yes     | <i>C. auris</i>                              | No                              | Anidulafungin                                           | Dead    |
|                                  |       | M/68        | Obesity, DM,<br>CKD                          | -                                           | 8                                             | Yes | No  | Yes | Yes     | <i>C. auris</i>                              | No                              | Anidulafungin                                           | Dead    |
|                                  |       | F/88        | AH, DM,<br>dementia                          | -                                           | 11                                            | Yes | No  | Yes | Yes     | <i>C. auris</i>                              | No                              | Anidulafungin                                           | Dead    |
| Riche [115]/<br>Brazil           | 11    | M/44        | DM, psoriasis,<br>schizophrenia              | Steroids                                    | -                                             | Yes | -   | Yes | 8 total | <i>C. albicans</i>                           | No                              | Anidulafungin                                           | Alive   |
|                                  |       | F/71        | AH, CVD                                      | Steroids                                    | 1                                             | Yes | -   | Yes |         | <i>C. glabrata</i>                           | No                              | No                                                      | Dead    |
|                                  |       | F/69        | DM, AH,<br>obesity, CVD,<br>CPD              | Steroids                                    | 9                                             | Yes | -   | Yes |         | <i>C. albicans</i>                           | No                              | Anidulafungin                                           | Dead    |
|                                  |       | F/37        | CPD                                          | Steroids                                    | 8                                             | Yes | -   | Yes |         | <i>C. tropicalis</i>                         | No                              | AMB<br>Fluconazole                                      | Dead    |
|                                  |       | F/87        | AH, CVD                                      | Steroids                                    | 6                                             | Yes | -   | Yes |         | <i>C. albicans</i>                           | No                              | Anidulafungin                                           | Dead    |
|                                  |       | M/66        | AH                                           | Steroids                                    | 14                                            | Yes | -   | Yes |         | <i>C. albicans</i>                           | No                              | Anidulafungin                                           | Alive   |
|                                  |       | M/91        | CPD                                          | Steroids                                    | 7                                             | Yes | -   | Yes |         | <i>C. albicans</i>                           | No                              | Anidulafungin                                           | Dead    |

|                                 |   |      |                           |                         |    |     |     |     |     |                                                            |                                                  |                                           |       |
|---------------------------------|---|------|---------------------------|-------------------------|----|-----|-----|-----|-----|------------------------------------------------------------|--------------------------------------------------|-------------------------------------------|-------|
|                                 |   | M/54 | DM, AH, obesity, Raynaud  | Steroids                | 0  | No  | -   | Yes |     | <i>C. albicans</i>                                         | No                                               | Fluconazole                               | Alive |
|                                 |   | M/41 | HIV, HCV, CVD             | Steroids                | 0  | Yes | -   | No  |     | <i>C. albicans</i>                                         | No                                               | Fluconazole                               | Dead  |
|                                 |   | M/57 | DM, AH                    | Steroids                | 22 | Yes | -   | Yes |     | <i>C. albicans</i>                                         | No                                               | Voriconazole<br>Anidulafungin             | Dead  |
|                                 |   | M/59 | AH, CKD                   | Steroids                | 3  | Yes | -   | Yes |     | <i>C. albicans</i>                                         | No                                               | Fluconazole                               | Dead  |
| Sari [116]/<br>Indonesia        | 1 | M/54 | AH, DM                    | Steroids<br>TCZ         | -  | -   | -   | -   | No  | <i>C. tropicalis</i>                                       | No                                               | Micafungin                                | Alive |
| Tafti [117]/<br>USA             | 1 | M/54 | Cirrhosis,<br>HBV, cancer | -                       | -  | -   | -   | -   | No  | <i>C. albicans</i>                                         | -                                                | -                                         | -     |
| Ventoulis [118]/<br>Greece      | 2 | M/76 | AH                        | -                       | 35 | Yes | Yes | Yes | Yes | <i>S. cerevisiae</i>                                       | No                                               | Anidulafungin<br>Fluconazole              | Alive |
|                                 |   | M/73 | AH, DM                    | -                       | 15 | Yes | Yes | Yes | Yes | <i>S. cerevisiae</i>                                       | No                                               | Anidulafungin<br>Fluconazole              | Alive |
| Villanueva [119]/<br>Mexico     | 6 | M/51 | AH, DM, obesity           | Steroids<br>BARI        | 37 | Yes | -   | Yes | Yes | <i>C. auris</i>                                            | No                                               | Caspofungin<br>Anidulafungin              | Dead  |
|                                 |   | M/55 | AH, DM, CVD               | Steroids<br>BARI        | 29 | Yes | -   | Yes | Yes | <i>C. auris</i><br><i>C. glabrata</i>                      | No                                               | Anidulafungin                             | Dead  |
|                                 |   | M/64 | -                         | Steroids<br>BARI        | 13 | Yes | -   | Yes | Yes | <i>C. auris</i>                                            | No                                               | Caspofungin<br>Voriconazole<br>AMB        | Dead  |
|                                 |   | M/64 | AH, obesity               | Steroids<br>TCZ<br>BARI | 10 | Yes | -   | Yes | Yes | <i>C. auris</i><br><i>C. glabrata</i>                      | No                                               | Anidulafungin<br>Isavuconazole            | Dead  |
|                                 |   | F/54 | AH, obesity               | Steroids<br>BARI        | 31 | Yes | -   | Yes | Yes | <i>C. auris</i>                                            | No                                               | AMB<br>Caspofungin<br>Voriconazole        | Dead  |
|                                 |   | M/46 | Obesity                   | Steroids<br>BARI        | 27 | Yes | -   | Yes | Yes | <i>C. auris</i>                                            | No                                               | Voriconazole<br>Caspofungin               | Dead  |
| Al-Argan [120]/<br>Saudi Arabia | 1 | M/70 | DM                        | Steroids                | -  | -   | -   | Yes | Yes | <i>C. albicans</i>                                         | No                                               | Caspofungin<br>Anidulafungin              | Alive |
| Gorkem [121]/<br>Turkey         | 1 | M/81 | AH, cancer                | -                       | 6  | Yes | Yes | Yes | Yes | <i>C. albicans</i>                                         | No                                               | No                                        | Dead  |
| Awada [122]/<br>Lebanon         | 1 | M/34 | No                        | -                       | -  | Yes | No  | Yes | Yes | <i>C. duobushaemulonii</i>                                 | No                                               | Caspofungin<br>Fluconazole<br>Flucytosine | Dead  |
| Gorospé-Sarasua [123]/<br>Spain | 1 | M/53 | No                        | TCZ                     | -  | Yes | No  | Yes | Yes | <i>C. albicans</i><br>(Blood culture and vertebral biopsy) | Costochondritis and spondylitis (4 months later) | Fluconazole                               | Alive |

Data are number (percentage), unless otherwise specified.

**Abbreviations.** AH, arterial hypertension; DM, diabetes mellitus; CVD, cardiovascular disease; CPD, chronic pulmonary disease; SOT, solid organ transplant; ICU, intensive care unit; IQR, interquartile range; TI, tracheal intubation; CVC, central venous catheter; TPN, total parenteral nutrition; ATB, broad-spectrum antibiotics; IMV, invasive mechanical ventilation; CKD, chronic kidney disease; AMB, amphotericin B; BARI, baricitinib; TCZ, tocilizumab; NS, not specified.

Table S5. Observational studies reporting candidemia and yeast fungemia associated with COVID-19.

| Author/<br>Country            | No. of<br>cases/<br>total (%) | Males (%)/<br>Median<br>age years<br>(IQR) | Underlying<br>diseases<br>(No.)                                              | Steroid /<br>Biological<br>therapies for<br>COVID-19<br>(No. of pts) | Days from<br>ICU/TI to<br>Candidemia | No. of<br>patients<br>with CVC<br>(%) | No. of<br>patients<br>with TPN<br>(%) | No. of<br>patients<br>received<br>ATB (%) | No. of<br>patients<br>under IMV<br>(%) | No. of<br><i>Candida</i> species (%)                                                                       | Patients treated<br>(%)/Anti-fungal<br>agents used (No. of<br>patients) | No. of<br>deaths<br>(%) |
|-------------------------------|-------------------------------|--------------------------------------------|------------------------------------------------------------------------------|----------------------------------------------------------------------|--------------------------------------|---------------------------------------|---------------------------------------|-------------------------------------------|----------------------------------------|------------------------------------------------------------------------------------------------------------|-------------------------------------------------------------------------|-------------------------|
| Chowdahary<br>[124]/<br>India | 15/596<br>(2.5)               | 11 (73.3)/<br>67 (52-72)                   | Obesity (1),<br>AH (7), DM<br>(6), CVD (3),<br>CKD (3), liver<br>disease (3) | Steroids (10)/<br>TCZ (3)                                            | 12 (8-14)                            | 15 (100)                              | -                                     | 15 (100)                                  | 8 (53.3)                               | <i>C. albicans</i> (3)<br><i>C. tropicalis</i> (1)<br><i>C. krusei</i> (1)<br><i>C. auris</i> (10)         | 15 (100)<br>Micafungin (13)<br>L-AMB (6)                                | 8<br>(53.3)             |
| Chen [21]/<br>China           | 4/99 (4)                      | -                                          | -                                                                            | -                                                                    | -                                    | -                                     | -                                     | -                                         | -                                      | <i>C. albicans</i> (3)<br><i>C. glabrata</i> (1)                                                           | -                                                                       | -                       |
| Bishburg/<br>USA              | 8/89<br>(8.9)                 | 4 (50)/<br>63 (44-73)                      | Polimialgia<br>reumatica (1)                                                 | Steroids (8)/<br>TCZ (4)                                             | 26 (21-35)                           | 8 (100)                               | -                                     | -                                         | 8 (100)                                | <i>C. albicans</i> (2)<br><i>C. glabrata</i> (2)<br><i>C. tropicalis</i> (2)<br><i>C. parapsilosis</i> (2) | 8 (100)<br>Caspofungin (5)<br>Fluconazole (7)                           | 3<br>(37.5)             |
| Hughes [126]/<br>UK           | 3/836<br>(0.4)                | -                                          | -                                                                            | -                                                                    | -                                    | -                                     | -                                     | -                                         | -                                      | <i>C. albicans</i> (3)                                                                                     | -                                                                       | -                       |
| Zhang [137]/<br>China         | 5/38<br>(13.2)                | -                                          | -                                                                            | -                                                                    | -                                    | -                                     | -                                     | -                                         | -                                      | <i>Candida</i> spp. (4)<br><i>T. asahii</i> (1)                                                            | -                                                                       | -                       |
| White [30]/<br>UK             | 5/135<br>(3.7)                | -                                          | Obesity (1),<br>CVD (1), CPD<br>(1), cancer (1)                              | -                                                                    | -                                    | 5 (100)                               | -                                     | -                                         | 5 (100)                                | <i>C. albicans</i> (5)<br><i>C. parapsilosis</i> (1)                                                       | 4 (80)<br>Caspofungin (2)<br>L-AMB (2)<br>Fluconazole (4)               | 3<br>(60)               |
| Rothe [36]/<br>Germany        | 3/140<br>(2.1)                | -                                          | -                                                                            | -                                                                    | -                                    | -                                     | -                                     | -                                         | -                                      | <i>C. albicans</i> (2)                                                                                     | -                                                                       | -                       |
| Posteraro [127]/<br>Italy     | 8/293<br>(2.7)                | -                                          | -                                                                            | -                                                                    | -                                    | -                                     | -                                     | -                                         | -                                      | <i>C. albicans</i> (3)<br><i>C. glabrata</i> (3)<br><i>C. parapsilosis</i> (2)<br><i>C. krusei</i> (1)     | -                                                                       | 4<br>(50)               |
| Falcone [44]/<br>Italy        | 5/315<br>(1.6)                | -                                          | -                                                                            | -                                                                    | -                                    | -                                     | -                                     | -                                         | -                                      | <i>C. parapsilosis</i> (5)                                                                                 | -                                                                       | -                       |
| Fekkar [45]/<br>France        | 1/260<br>(0.4)                | 1 (100)/<br>40                             | Obesity (1),<br>AH (1)                                                       | -                                                                    | 10                                   | 1 (100)                               | -                                     | -                                         | 1 (100)                                | <i>Candida</i> spp. (1)                                                                                    | Caspofungin (1)<br>Voriconazole (1)                                     | 0                       |
| Mastrangelo<br>[128]/Italy    | 21/-                          | 16 (76.2)/<br>71 (57-75)                   | DM (2),<br>CKD (4),<br>IS therapy (11)                                       | Steroids (8)                                                         | 24 (12-28)                           | 17 (80.9)                             | 8 (38.1)                              | 19 (90.5)                                 | 14 (66.7)                              | <i>C. albicans</i> (14)<br><i>C. non-albicans</i> (7)                                                      | 21 (100)                                                                | 12 (57.1)               |
| Cataldo [129]/<br>Italy       | 5/57<br>(8.8)                 | -                                          | -                                                                            | -                                                                    | -                                    | -                                     | -                                     | -                                         | -                                      | <i>C. albicans</i> (2)<br><i>C. glabrata</i> (1)<br><i>C. parapsilosis</i> (3)                             | -                                                                       | -                       |
| Giacobbe [130]/<br>Italy      | 3/78<br>(3.8)                 | -                                          | -                                                                            | TCZ (2)                                                              | -                                    | -                                     | -                                     | -                                         | -                                      | <i>C. albicans</i> (3)<br><i>C. tropicalis</i> (1)                                                         | -                                                                       | -                       |

| <i>C. parapsilosis</i> (1)      |                   |                          |                                                                                                  |                            |                      |            |           |           |           |                                                                                                                                                                                                  |                                                                                                                           |              |
|---------------------------------|-------------------|--------------------------|--------------------------------------------------------------------------------------------------|----------------------------|----------------------|------------|-----------|-----------|-----------|--------------------------------------------------------------------------------------------------------------------------------------------------------------------------------------------------|---------------------------------------------------------------------------------------------------------------------------|--------------|
| Nucci [131]/<br>Brazil          | 9/41<br>(21.9)    | 5 (55.6)/<br>62 (54-87)  | DM (3), CVD<br>(6), cancer (1),<br>CKD (1), liver<br>disease (1),<br>neurological<br>disease (2) | -                          | 17 (0-22)            | 9 (100)    | -         | -         | 9 (100)   | <i>C. albicans</i> (5)<br><i>C. glabrata</i> (1)<br><i>C. tropicalis</i> (2)<br><i>C. famata</i> (1)                                                                                             | 6 (66.7)<br>Anidulafungin (6)                                                                                             | 6<br>(66.7)  |
| Magnasco<br>[132]/<br>Italy     | 4/118<br>(3.4)    | 4 (100)/<br>63 (62-66)   | Obesity (2),<br>CPD (1)                                                                          | -                          | -                    | -          | -         | -         | 4 (100)   | <i>C. auris</i> (4)                                                                                                                                                                              | 4 (100)<br>Caspofungin (4)<br>L-AMB (1)                                                                                   | 2<br>(50)    |
| Obata [51]/<br>USA              | 4/226<br>(1.8)    | -                        | -                                                                                                | Steroids (4)<br>TCZ (3)    | -                    | -          | -         | -         | -         | <i>Candida</i> spp. (4)                                                                                                                                                                          | -                                                                                                                         | -            |
| Ripa [2]/<br>Italy              | 7/731<br>(0.9)    | -                        | -                                                                                                | -                          | -                    | -          | -         | -         | -         | <i>C. albicans</i> (5)<br><i>C. parapsilosis</i> (2)                                                                                                                                             | -                                                                                                                         | -            |
| Versyck [54]/<br>France         | 3/54<br>(5.6)     | -                        | -                                                                                                | -                          | -                    | -          | -         | -         | -         | <i>C. albicans</i> (2)<br><i>C. tropicalis</i> (1)                                                                                                                                               | -                                                                                                                         | -            |
| Kayaaslan [15]/<br>Turkey       | 105/2487<br>(4.2) | 55 (52.4)/<br>74 (60-81) | Obesity (52),<br>DM (38), CVD<br>(29), CPD (23),<br>CKD (17),<br>cancer (11),<br>ID (6)          | Steroids (67)              | 13 (8-24)            | 103 (98.1) | 26 (24.8) | 99 (94.3) | 92 (87.6) | <i>Candida</i> spp. (11)<br><i>C. albicans</i> (42)<br><i>C. glabrata</i> (19)<br><i>C. tropicalis</i> (13)<br><i>C. parapsilosis</i> (20)                                                       | 55 (52.4)<br>Anidulafungin (31)<br>Caspofungin (3)<br>L-AMB (1)<br>Micafungin (7)<br>Fluconazole (11)<br>Voriconazole (2) | 97 (92.4)    |
| Arastehfar<br>[133]/<br>Iran    | 7/1988<br>(0.4)   | 3 (42.9)/<br>68 (20-70)  | DM (1), cancer<br>(3)                                                                            | -                          | 6 (4-31)             | 7 (100)    | 7 (100)   | 7 (100)   | 5 (71.4)  | <i>C. albicans</i> (5)<br><i>C. glabrata</i> (3)<br><i>R. mucilaginosa</i> (1)                                                                                                                   | 7 (100)<br>Caspofungin (5)<br>Fluconazole (7)                                                                             | 6 (85.7)     |
| Silva [134]/<br>Brazil          | 3/212<br>(1.4)    | -                        | -                                                                                                | -                          | -                    | -          | -         | -         | -         | <i>C. albicans</i> (1)<br><i>C. glabrata</i> (1)<br><i>C. tropicalis</i> (1)                                                                                                                     | 1 (33.3)<br>Fluconazole (1)                                                                                               | -            |
| Signorini [60]/<br>Italy        | 41/92<br>(44.6)   | -                        | -                                                                                                | -                          | -                    | -          | -         | -         | -         | <i>C. albicans</i> (33)<br><i>Candida non-albicans</i><br>(8)                                                                                                                                    | -                                                                                                                         | -            |
| Seagle [14]/<br>USA             | 64/251<br>(25.5)  | 41 (64.1)/<br>-          | Obesity (21),<br>DM (34), CVD<br>(21), CPD (12),<br>HSCT (1), SOT<br>(3), HCV (2),<br>cancer (2) | Steroids (34)/<br>TCZ (57) | 15 (8-21)            | 51 (79.7)  | 4 (6.3)   | -         | 51 (79.7) | <i>C. albicans</i> (24)<br><i>Candida</i> spp (1)<br><i>C. glabrata</i> (17)<br><i>C. tropicalis</i> (4)<br><i>C. parapsilosis</i> (8)<br><i>C. dubliniensis</i> (3)<br><i>C. lusitaniae</i> (3) | 53 (82.8)                                                                                                                 | 40<br>(62.5) |
| Rodriguez<br>[135]/<br>Colombia | 20/-              | 13 (65)/<br>63 mean      | AH (11),<br>DM (6),<br>CKD (5),<br>cancer (2)                                                    | Steroids (19)              | 17,7<br>(range 6-35) | 19 (95)    | 2 (10)    | 20 (100)  | 19 (95)   | <i>C. albicans</i> (2)<br><i>C. glabrata</i> (1)<br><i>C. tropicalis</i> (4)<br><i>C. parapsilosis</i> (3)<br><i>C. auris</i> (6)<br><i>C. orthopsilosis</i> (1)<br><i>T. asahii</i> (1)         | 15 (75)<br>Caspofungin (5)<br>Fluconazole (8)<br>Voriconazole (2)                                                         | 12 (60)      |

|                           |                 |                      |                                 |              |            |          |          |          |           |                                    |   |        |
|---------------------------|-----------------|----------------------|---------------------------------|--------------|------------|----------|----------|----------|-----------|------------------------------------|---|--------|
| Macauley<br>[136]/<br>USA | 12/236<br>(5.1) | 9 (75)/<br>62 +/- 16 | DM (1),<br>liver disease<br>(1) | Steroids (6) | 19 (11-28) | 12 (100) | 2 (16.7) | 12 (100) | 11 (91.7) | <i>C. albicans</i> (4)             | - | 9 (75) |
|                           |                 |                      |                                 |              |            |          |          |          |           | <i>C. glabrata</i> (2)             |   |        |
|                           |                 |                      |                                 |              |            |          |          |          |           | <i>C. tropicalis</i> (2)           |   |        |
|                           |                 |                      |                                 |              |            |          |          |          |           | <i>C. parapsilosis</i> (3)         |   |        |
|                           |                 |                      |                                 |              |            |          |          |          |           | <i>C. dubliniensis</i> (1)         |   |        |
|                           |                 |                      |                                 |              |            |          |          |          |           | <i>Candida non-albicans</i><br>(1) |   |        |

Data are number (percentage), unless otherwise specified.

**Abbreviations.** AH, arterial hypertension; DM, diabetes mellitus; CVD, cardiovascular disease; CPD, chronic pulmonary disease; SOT, solid organ transplant; ICU, intensive care unit; IQR, interquartile range; TI, tracheal intubation; CVC, central venous catheter; TPN, total parenteral nutrition; ATB, broad-spectrum antibiotics; IMV, invasive mechanical ventilation; CKD, chronic kidney disease; AMB, amphotericin B; BARI, baricitinib; TCZ, tocilizumab; NS, not specified.
