# Supplementary material for: Invasive Fungal Infections Complicating COVID-19: A Narrative Review
Source: MDPI journal article supplement (doi:10.3390/jof7110921), 2021-10-29
Supplement: s1 [file s1]

Table S6. Case report/case series describing mucormycosis associated with COVID-19.

| Author/<br>Country    | Cases | Sex/<br>Age | Underlyig<br>diseases                                               | Therapy<br>COVID-19<br>(No. of<br>patient) | During<br>/Post<br>COVID | Site                                | HP diagnosis      | Positive culture,<br>specimen    | Species                        | Antifungal/<br>surgery       | Outcome |
|-----------------------|-------|-------------|---------------------------------------------------------------------|--------------------------------------------|--------------------------|-------------------------------------|-------------------|----------------------------------|--------------------------------|------------------------------|---------|
| Bellanger [84]/France | 1     | M/55        | Cancer (1)                                                          | Steroids                                   | During                   | Pulmonary                           | -                 | BAL                              | <i>R. microsporus</i>          | AMB/No                       | Dead    |
| Zurl [138]/Austria    | 1     | M/53        | Obesity (1),<br>AML with<br>neutrope-<br>nia(1)                     | Steroids<br>TCZ                            | During                   | Pulmonary,<br>pleural effusion      | Autopsy           | No                               | <i>R. microsporus</i>          | No/No                        | Dead    |
| Garg [139]/India      | 1     | M/55        | DM (1),<br>CVD (1),<br>CKD (1)                                      | Steroids                                   | During                   | Pulmonary                           | Sputum            | Sputum                           | <i>R. microsporus</i>          | AMB/No                       | Alive   |
| Johnson [88]/USA      | 1     | M/79        | AH (1), DM<br>(1)                                                   | -                                          | During                   | Pulmonary                           | BAL               | BAL                              | <i>R. arrhizus</i>             | AMB/No                       | Alive   |
| Khatri [140]/USA      | 1     | M/68        | AH (1), DM<br>(1), CVD (1),<br>SOT (1),<br>steroids (1),<br>CKD (1) | -                                          | Post                     | Soft tissues,<br>blood vessels wall | Pleural effusion  | Pleural effusion<br>Soft tissues | <i>R. microsporus</i>          | Posaconazole<br>AMB/<br>Yes  | Dead    |
| Pasero [141]/Italy    | 1     | M/66        | AH (1)                                                              | -                                          | During                   | Pulmonary                           | BAL               | BAL                              | <i>Rhizopus</i> spp.           | Isavuconazole<br>AMB/No      | Dead    |
| Arana [142]/Spain     | 2     | M/62        | AH,DM,<br>CKD, CVD,<br>SOT                                          | Steroids                                   | During                   | Rhino-sinusal                       | Nasal biopsy      | Nasal swab                       | <i>R. arrhizus</i>             | Isavuconazole<br>AMB/Yes     | Alive   |
|                       |       | M/48        | AH, CKD,<br>SOT                                                     | Steroids                                   | During                   | Muscolo-skeletal                    | Muscle biopsy     | Muscle biopsy                    | <i>L. ramosa</i>               | Isavuconazole<br>AMB/<br>Yes | Alive   |
| Rao [143]/India       | 1     | M/66        | DM                                                                  | Steroids                                   | During                   | ROC                                 | Nasal swab        | No                               | -                              | AMB/Yes                      | Alive   |
| Krishna [144]/UK      | 1     | M/22        | Obesity                                                             | Steroids                                   | During                   | Disseminated                        | Autopsy           | No                               | <i>Mucorales</i> spp.<br>(PCR) | No/No                        | Dead    |
| Meshram [145]/India   | 2     | M/45        | AH, DM,<br>SOT, chronic<br>steroid                                  | No                                         | Post                     | RO                                  | Nasal biopsy      | No                               | -                              | AMB/Yes                      | Dead    |
|                       |       | M/23        | AH, DM,<br>SOT, chronic<br>steroids                                 | No                                         | Post                     | Pulmonary                           | BAL + lung biopsy | No                               | -                              | AMB/Yes                      | Dead    |
| Nehara [146]/India    | 5     | F/59        | AH, DM                                                              | -                                          | During                   | ROC                                 | Nasal discharge   | Nasal discharge                  | <i>Rhizopus</i> spp.           | AMB/No                       | Dead    |
|                       |       | M/52        | DM                                                                  | -                                          | During                   | ROC                                 | Nasal discharge   | Nasal discharge                  | <i>R. arrhizus</i>             | AMB<br>Posaconazole/<br>No   | Alive   |
|                       |       | F/62        | AH, DM                                                              | -                                          | During                   | ROC                                 | Nasal scraping    | Nasal scraping                   | <i>Rhizopus</i> spp.           | AMB/Yes                      | Alive   |

|                            |       |       |                        |                 |        |                                          |                |                              |                       |                                                                          |       |
|----------------------------|-------|-------|------------------------|-----------------|--------|------------------------------------------|----------------|------------------------------|-----------------------|--------------------------------------------------------------------------|-------|
|                            |       | F/70  | DM                     | -               | During | ROC                                      | Nasal scraping | Nasal scraping               | <i>R. arrhizus</i>    | AMB/No                                                                   | Alive |
|                            |       | F/68  | DM                     | -               | During | ROC                                      | Nasal scraping | Nasal scraping               | <i>R. arrhizus</i>    | AMB/No                                                                   | Dead  |
| Buil [147]/<br>Netherlands | 4     | M/60s | No                     | Steroid<br>TCZ  | During | Pulmonary                                | -              | Sputum                       | <i>R. microsporus</i> | Voriconazole<br>AMB<br>Posaconazole/No                                   | Alive |
|                            | +CAPA | M/50s | No                     | Steroid<br>TCZ  | During | Pulmonary                                | -              | BAL                          | <i>L. ramosa</i>      | Voriconazole<br>AMB<br>Posaconazole/No                                   | Dead  |
|                            | +CAPA | M/60s | CLL, DM,<br>obesity    | Steroid<br>TCZ  | During | Pulmonary                                | Autopsy        | BAL                          | <i>R. microsporus</i> | Voriconazole<br>Anidulafungin<br>Isavuconazole<br>Voriconazole/No<br>AMB | Dead  |
|                            |       | M/70s | DM, chronic<br>steroid | Steroid         | Post   | ROC                                      | -              | Orbital purulent<br>material | <i>R. arrhizus</i>    | AMB<br>Isavuconazole/Yes                                                 | Dead  |
| Ashour [148]/<br>Egypt     | 7     | F/65  | DM                     | -               | During | ROC                                      | Nasal biopsy   | Nasal biopsy                 | NS                    | AMB<br>Itraconazole/Yes                                                  | Alive |
|                            |       | M/67  | DM, CKD                | -               | During | ROC                                      | Nasal biopsy   | No                           | -                     | AMB/No                                                                   | Dead  |
|                            |       | M/42  | DM, CVD                | -               | During | Rhino-sinusal                            | Nasal biopsy   | No                           | -                     | AMB/Yes                                                                  | Alive |
|                            |       | F/63  | DM                     | -               | Post   | ROC                                      | Nasal biopsy   | Nasal biopsy                 | -                     | Yes/Yes                                                                  | Alive |
|                            |       | F/41  | DM                     | -               | During | ROC                                      | Nasal biopsy   | No                           | -                     | AMB/Yes                                                                  | Alive |
|                            |       | M/54  | AH, DM,<br>CKD, CVD    | -               | During | Rhino-sinusal                            | Nasal biopsy   | No                           | -                     | Yes/No                                                                   | Dead  |
|                            |       | M/50  | DM                     | -               | Post   | ROC                                      | Nasal biopsy   | No                           | -                     | Yes/Yes                                                                  | Dead  |
| Kanwar<br>[149]/USA        | 1     | M/56  | CKD                    | Steroids<br>TCZ | Post   | Pulmonary                                | Pleural biopsy | Pleural effusion             | <i>R. azygosporus</i> | AMB/Yes                                                                  | Dead  |
| Placik [150]/<br>USA       | 1     | M/49  | No                     | Steroids<br>TCZ | During | Pulmonary<br>(bronchopleural<br>fistula) | Lung biopsy    | Pulmonary tissue             | <i>Rhizopus</i> spp.  | AMB/Yes                                                                  | Dead  |
| Veisi[151]/<br>Iran        | 2     | F/40  | No                     | Steroids        | During | ROC                                      | Nasal biopsy   | No                           | -                     | AMB (iv and<br>topical)/Yes                                              | Dead  |
|                            |       | M/54  | DM                     | Steroids        | During | RO                                       | Nasal biopsy   | No                           | -                     | AMB<br>Posaconazole/Yes                                                  | Alive |
| Saldanha<br>[152]/India    | 1     | F/42  | DM                     | -               | During | ROC                                      | Nasal biopsy   | No                           | -                     | AMB/Yes                                                                  | Alive |
| Revannavar<br>[153]/India  | 1     | F/-   | DM                     | -               | During | ROC                                      | Nasal biopsy   | Nasal biopsy                 | <i>Rhizopus</i> spp.  | AMB/Yes                                                                  | Alive |
| Maini [154]/<br>India      | 1     | M/38  | No                     | Steroids        | During | RO                                       | Nasal biopsy   | Nasal biopsy                 | <i>R. arrhizus</i>    | AMB<br>Fluconazole/Yes                                                   | Alive |
| Alekseyev<br>[155]/USA     | 1     | M/41  | DM                     | Steroids        | During | ROC                                      | Nasal biopsy   | No                           | -                     | AMB/Yes                                                                  | Alive |
| Krishna<br>[156]/India     | 2     | M/34  | AH, DM                 | -               | During | RO                                       | Nasal biopsy   | No                           | -                     | AMB<br>Itraconazole/Yes                                                  | Alive |
|                            |       | M/50  | DM                     | -               | During | RO                                       | Nasal biopsy   | No                           | -                     | AMB<br>Posaconazole/Yes                                                  | Alive |

|                              |    |      |                        |              |        |              |                |                        |                        |                                                   |       |
|------------------------------|----|------|------------------------|--------------|--------|--------------|----------------|------------------------|------------------------|---------------------------------------------------|-------|
| Werthman-Ehreeich [157]/USA  | 1  | F/33 | AH, DM, CPD            | -            | During | RO           | Nasal biopsy   | Nasal biopsy           | NS                     | AMB/Yes                                           | Dead  |
| Hanley [158]/UK              | 1  | M/22 | Obesity, panchreatitis | -            | During | Disseminated | Autopsy        | No                     | -                      | No/No                                             | Dead  |
| Mehta [159]/India            | 1  | M/60 | DM, CVD                | Steroids TCZ | During | RO           | Nasal biopsy   | Nasal biopsy           | NS                     | AMB/Yes                                           | Dead  |
| do Monte-Junior [160]/Brazil | 1  | M/86 | AH                     | Steroids     | During | Gastric      | Gastric biopsy | No                     | -                      | No/No                                             | Dead  |
| Mekonnen [161]/USA           | 1  | M/60 | AH, DM, CPD            | Steroids     | During | RO           | Nasal biopsy   | Nasal biopsy           | <i>Rhizopus</i> spp.   | AMB (iv and topical) Posaconazole Caspofungin/Yes | Dead  |
| Selarka [162]/India          | 1  | M/42 | DM                     | Steroids     | Post   | RO           | Nasal aspirate | No                     | -                      | AMB/Yes                                           | Alive |
| Sarkar [163]/India           | 10 | M/67 | DM                     | Steroids     | During | RO           | Nasal biopsy   | Negative               | No                     | AMB/Yes                                           | Alive |
|                              |    | M/49 | DM                     | Steroids     | During | RO           | Nasal biopsy   | Negative               | No                     | AMB/No                                            | Dead  |
|                              |    | M/23 | DM                     | Steroids     | During | RO           | Nasal biopsy   | Nasal biopsy           | <i>Rhizopus</i> spp.   | AMB/Yes                                           | Dead  |
|                              |    | F/59 | DM                     | Steroids     | During | RO           | Nasal swab     | Nasal swab             | <i>Mucor</i> spp.      | AMB/No                                            | Dead  |
|                              |    | F/27 | DM                     | Steroids     | During | RO           | Nasal biopsy   | Nasal biopsy           | <i>Rhizopus</i> spp.   | AMB/Yes                                           | Alive |
|                              |    | M/45 | DM                     | Steroids     | During | RO           | Nasal biopsy   | Nasal biopsy           | <i>Mucor</i> spp.      | AMB/Yes                                           | Alive |
|                              |    | M/48 | DM                     | Steroids     | During | ROC          | Nasal biopsy   | Nasal swab             | <i>Rhizopus</i> spp.   | AMB/No                                            | Dead  |
|                              |    | M/62 | DM                     | Steroids     | During | RO           | Nasal biopsy   | Nasal biopsy           | <i>Rhizopus</i> spp.   | AMB/yes                                           | Alive |
|                              |    | M/43 | DM                     | Steroids     | During | RO           | Nasal biopsy   | Negative               | No                     | AMB/yes                                           | Alive |
| Karimi-Galougahi [164]/India | 1  | F/61 | DM                     | Steroids     | During | RO           | Nasal biopsy   | Negative               | No                     | AMB/yes                                           | Alive |
|                              |    |      |                        |              |        |              |                |                        |                        |                                                   |       |
|                              |    |      |                        |              |        |              |                |                        |                        |                                                   |       |
|                              |    |      |                        |              |        |              |                |                        |                        |                                                   |       |
|                              |    |      |                        |              |        |              |                |                        |                        |                                                   |       |
|                              |    |      |                        |              |        |              |                |                        |                        |                                                   |       |
|                              |    |      |                        |              |        |              |                |                        |                        |                                                   |       |
|                              |    |      |                        |              |        |              |                |                        |                        |                                                   |       |
|                              |    |      |                        |              |        |              |                |                        |                        |                                                   |       |
| Dallalzadeh [165]/USA        | 1  | M/48 | DM                     | Steroids     | During | ROC          | No             | Purulent orbital fluid | <i>Rhizopus</i> spp.   | AMB Isavuconazole/No                              | Dead  |
| Weizel-Haiat [166]/Mexico    | 1  | F/24 | Obesity, DM            | -            | During | RO           | Nasal swab     | Nasal swab             | <i>Lichthemia</i> spp. | AMB/No                                            | Dead  |
| Khan [167]/USA               | 1  | F/44 | DM                     | Steroids     | During | Pulmonary    | BAL            | No                     | -                      | AMB Voriconazole Micafungin/No                    | Dead  |
| Pauli [168]/Brazil           | 1  | F/50 | DM                     | -            | During | Palatal      | Nasal biopsy   | No                     | -                      | AMB/Yes                                           | No    |

Data are number (percentage), unless otherwise specified.

**Abbreviations.** AH, arterial hypertension; DM, diabetes mellitus; CVD, cardiovascular disease; CPD, chronic pulmonary disease; SOT, solid organ transplant; ICU, intensive care unit; IQR, interquartile range; TI, tracheal intubation; CKD, chronic kindeny disease; AML, acute myeloid leukemia; CLL, chronic lymphocytic leukemia; ID, immunedepression; SOT; solid organ transplantation; AMB, amphotericin B; TCZ, tocilizumab; RO, rhino-orbital; ROC; rhino-orbital-cerebral; NS, not specified; NR, not reported; BAL, bronchial alveolar alavage; HP, histopathological.

Table S7. Observational studies describing mucormycosis associated with COVID-19.

| Author/<br>Country         | No. of<br>cases/<br>total<br>(%) | Males (%)/<br>Median<br>age yrs<br>(IQR) | Underlying<br>diseases                                                                          | Therapy<br>COVID-19<br>(No. of<br>patient) | During/<br>Post<br>COVID | Site (%)                                                     | No. of HP<br>diagnosis<br>(%)         | Positive<br>culture, No.<br>(%) | Species (No.)                                                | Patients treated<br>(%)/Anti-fungal<br>agents used<br>(No.) | Surgery/<br>No. of<br>patients (%) | Deaths (%) |
|----------------------------|----------------------------------|------------------------------------------|-------------------------------------------------------------------------------------------------|--------------------------------------------|--------------------------|--------------------------------------------------------------|---------------------------------------|---------------------------------|--------------------------------------------------------------|-------------------------------------------------------------|------------------------------------|------------|
| Fekkar<br>[45]/<br>France  | 2/260<br>(0.8)                   | 2 (100)/<br>50 & 75<br>years             | Obesity (2),<br>AH (1),<br>SOT (1)                                                              | -                                          | 2/0                      | Pulmonary (2)                                                | 0                                     | 0/2                             | <i>Rhizopus</i> /<br><i>Mucor</i> (2; positive<br>PCR on RS) | 1 (50)<br>VRC (1)<br>ISA (1)<br>AMB (1)<br>CAS (1)          | 0                                  | 1 (50)     |
| Ravani<br>[169]/<br>India  | 19/31<br>(61.3)                  | -                                        | -                                                                                               | Steroids (19)                              | 0/19                     | RO (19), of which 7<br>with cerebral<br>involvement          | 19 (100)                              | 0                               | NS (19)                                                      | 19 (100)<br>POS (19)<br>AMB (19)                            | 19 (100)                           | -          |
| Sen [170]/<br>India        | 6/-                              | 6 (100)/<br>61 (47-72)                   | AH (83), DM<br>(6), CVD (2)                                                                     | Steroids (5)                               | 1/5                      | RO (1)<br>ROC (5)                                            | 4 (80)                                | 3 (50)                          | <i>Mucor</i> spp. (6)                                        | 6 (100)<br>POS (5)<br>VRC (1)<br>AMB (2), 1 topic           | 6 (100)                            | 0          |
| Pakdel<br>[171]/<br>Iran   | 15/58<br>(25.9)                  | 10 (66.7)/<br>52 (14-71)                 | AH (7), DM<br>(13), CVD<br>(2), CPD (2),<br>cancer (2),<br>cirrhosis (1),<br>neutropenia<br>(3) | Steroids (7)                               | 15/0                     | RO (12)<br>Orbital (2)<br>Rhino-sinusal (1)                  | 15 (100)                              | 15 (100)                        | NS (15)                                                      | 15 (100)<br>POS (4)<br>AMB (15)<br>CAS (3)                  | 14 (93.3)                          | 7 (46.7)   |
| Bayram<br>[18]/<br>India   | 11/<br>32'814<br>(0.03)          | 9 (81.8)/<br>73 (68-79)                  | AH (5),<br>DM (2), CVD<br>(3), CKD (2),<br>MDS (1)                                              | Steroids (11)<br>TCZ (2)                   | 11/0                     | RO (8)<br>ROC (3)                                            | 11 (100)                              | 11 (100)                        | <i>Rhizopus</i> spp. (11)                                    | 11 (100)<br>AMB iv + topic (11)                             | 11 (100)                           | 7 (63.6)   |
| Moorthy<br>[172]/<br>India | 17/18<br>(94.4)                  | 15 (83.3)/<br>56 (47-63)                 | DM (15)                                                                                         | Steroids (15)                              | 4/13                     | RO (6)<br>ROC (5)<br>Rhino-sinusal (3)<br>Rhino-cerebral (3) | 17 (100)<br>+ 1<br><i>Aspergillus</i> | -                               | NS (17)                                                      | 17 (100)<br>AMB (17)                                        | 16 (94.1)                          | 6 (35.5)   |
| Sharma<br>[173]/<br>India  | 23/-                             | 15 (65.2)/<br>NR                         | AH (14), DM<br>(21), CKD (1)                                                                    | Steroids (23)                              | 4/19                     | RO (8)<br>ROC (2)<br>Rhino-sinusal (13)                      | 23 (100)                              | -                               | NS (23)                                                      | 23 (100)<br>AMB (23; topic<br>application in 2<br>cases)    | 23 (100)                           | 0          |
| Ismaiel<br>[174]/<br>Egypt | 12/29<br>(41.4)                  | -                                        | DM (8), CKD<br>(1), IS 81)                                                                      | -                                          | 0/12                     | RO (12)                                                      | 12 (100)                              | 12 (100)                        | <i>R. arrhizus</i> (8)<br><i>Lichtemia</i> (2)<br>NS (2)     | -                                                           | -                                  | -          |
| Fouad<br>[175]/<br>Egypt   | 6/12<br>(50)                     | 4 (66.7)/<br>54 (42-63)                  | DM (6), CVD<br>(1), CKD (2)                                                                     | Steroids (3)                               | 5/1                      | RO (3)<br>ROC (3)                                            | 6 (100)                               | 0                               | -                                                            | 6 (100)                                                     | 3 (50)                             | 3 (50)     |

|                              |                       |                            |                                                                                                       |                                |                                                  |                                                                                  |                   |                                                      |                                                                       |                                                  |                                                                           |              |
|------------------------------|-----------------------|----------------------------|-------------------------------------------------------------------------------------------------------|--------------------------------|--------------------------------------------------|----------------------------------------------------------------------------------|-------------------|------------------------------------------------------|-----------------------------------------------------------------------|--------------------------------------------------|---------------------------------------------------------------------------|--------------|
| Patel [176]/<br>India        | 187/<br>287<br>(65.2) | 150 (80.2)/<br>57 +/- 12   | DM (113),<br>cancer (2),<br>SOT (3)                                                                   | Steroids<br>(150)<br>TCZ (5)   | Early 29,<br>late 158*                           | Pulmonar (16)<br>RO (117)<br>ROC (44)<br>Disseminated (4)<br>Renal (1)<br>NS (5) | 143 (76.5)        | 100 (53.5)                                           | <i>Mucorales</i> (99)<br><i>Mucorales</i> +<br><i>Aspergillus</i> (1) | 187 (100)<br>POS (73)<br>ISA (19)<br>AMB (136)   | 131 (70.1)                                                                | 75 (40.1)    |
| Sen [177]/<br>India          | 2826/-                | 1993 (71)/<br>53 (12-88)   | DM (2194),<br>AH (690),<br>CKD (88),<br>obesity (2),<br>CPD (17),<br>CVD (24),<br>HIV (4), SOT<br>(4) | Steroids<br>(2073)<br>TCZ (58) | Median<br>13 days<br>since<br>COVID<br>diagnosis | Rhino-sinusal (752)<br>RO (1344)<br>ROC (573)                                    | 1090/2795<br>(39) | 432/2175(19)<br><br>1931/2175<br>with<br>positive DE | NS (432)                                                              | 2066 (73)<br>AMB (2066)<br>POS (698)<br>ISA (34) | 1585/2358<br>FESS (67),<br>of which<br>367 did<br>orbital<br>exenteration | 305/2218(14) |
| Rabagliati<br>[61]/<br>Chile | 2/146<br>(1.4)        | 2 (100)/<br>58.5<br>median | AH (1),<br>DM (1), CVD<br>(1)                                                                         | Steroids (1)                   | 2/0                                              | Pulmonary (2), of<br>which 1 with<br>cerebral<br>involvement                     | 0                 | 2 (100)                                              | <i>R. stolonifer</i> (1)<br><i>R. microsporus</i> (1)                 | 1 (50)<br>AMB (1)                                | 0                                                                         | 1 (50)       |

Data are number (percentage), unless otherwise specified.

**Abbreviations.** AH, arterial hypertension; DM, diabetes mellitus; CVD, cardiovascular disease; CPD, chronic pulmonary disease; SOT, solid organ transplant; ICU, intensive care unit; IQR, interquartile range; TI, tracheal intubation; CKD, chronic kidney disease; SOT; solid organ transplantation; MDS, myelodysplastic syndrome; AMB, amphotericin B; TCZ, tocilizumab; RO, rhino-orbital; ROC; rhino-orbital-cerebral; NS, not specified; NR, not reported; BAL, bronchial alveolar lavage; CT, chemotherapy; TA, tracheal aspirate; HP, histopathological; VRC, voriconazole; ISA, isavuconazole; CAS, caspofungin; POS, Posaconazole; RS, respiratory sample; DE, direct examination of respiratory samples.

\* cut-off time: 8 days since COVID-19 diagnosis.
