# Supplementary material for: Invasive Fungal Infections Complicating COVID-19: A Narrative Review
Source: MDPI journal article supplement (doi:10.3390/jof7110921), 2021-10-29
Supplement: s1 [file s1]

Table S2. Observational studies reporting CAPA.

| Author/<br>Country/<br>Algorithm              | Cases/<br>total (%) | Males (%) /<br>Median age<br>years (IQR) | Underlying<br>diseases<br>(No. of patients)                                          | Days from<br>ICU/TI to<br>CAPA<br>median<br>(IQR) | No. culture-positive<br>samples/total<br>(sample type)<br><i>Aspergillus</i> spp. (n)                           | No. of GM-<br>positive<br>samples/total<br>(sample type)/<br>Median ODI | No. of PCR-<br>positive<br>samples/total<br>(sample type) | No. of<br>BDG<br>positive<br>samples/<br>total | Specific imaging<br>findings/Type<br>(No. of patients) | Patients treated<br>(%)/Anti-fungal<br>agents (No. of<br>patients)  | No. of<br>deaths<br>(%) |
|-----------------------------------------------|---------------------|------------------------------------------|--------------------------------------------------------------------------------------|---------------------------------------------------|-----------------------------------------------------------------------------------------------------------------|-------------------------------------------------------------------------|-----------------------------------------------------------|------------------------------------------------|--------------------------------------------------------|---------------------------------------------------------------------|-------------------------|
| Bartoletti [20]/<br>Italy/<br>mAspICU         | 30/108<br>(27.8)    | 24 (80)/<br>63 (57-70)                   | Obesity (10),<br>AH (16), DM (5),<br>CVD (6), CPD<br>(4), SOT (1)                    | 4                                                 | 19/30 (BAL)<br><i>A. fumigatus</i> (15)<br><i>A. niger</i> (3)<br><i>A. flavus</i> (1)                          | 1/30 (serum)/-<br>30/30 (BAL)/3.5                                       | 20/30 (BAL)                                               | -                                              | -                                                      | 16 (53.3)<br>Voriconazole (13)<br>Other (3)                         | 16<br>(53.3)            |
| Chen [21]/<br>China/<br>NR                    | 1/99<br>(1%)        | -                                        | -                                                                                    | -                                                 | 1/NR<br><i>A. flavus</i> (1)                                                                                    | -                                                                       | -                                                         | -                                              | -                                                      | -                                                                   | -                       |
| Koehler [22]/<br>Germany/<br>AspICU<br>pers.* | 5/19<br>(26.3)      | 3 (15.7)/<br>62 (54-72)                  | Obesity (1),<br>AH (3), DM (1),<br>CPD (2)                                           | -                                                 | 1/3 (BAL)<br>2/3 (TA)<br><i>A. fumigatus</i> (3)                                                                | 2/5 (serum)/1.7<br>3/3 (BAL)/2.5                                        | 3/3 (BAL)<br>1/2 (TA)                                     | -                                              | 5/5<br>Nodules (5)<br>Cavity (1)<br>Air-crescent (1)   | 5 (100)<br>Voriconazole (4)<br>Isavuconazole (1)<br>Caspofungin (2) | 3<br>(60)               |
| Lahmer [23]/<br>Germany/<br>AspICU pers.**    | 11/32<br>(34.3)     | 7 (63.6)/<br>72 (58-84)                  | AH (7), DM (3),<br>CVD (2), CPD<br>(2), CKD(1)                                       | 4 (1-7)                                           | 9/11 (BAL)<br><i>A. fumigatus</i> (9)                                                                           | 4/11 (serum)/1.5<br>11/11 (BAL)/6.4§                                    | -                                                         | -                                              | -                                                      | 11 (100)<br>Voriconazole (5)<br>Isavuconazole (1)<br>Amb (5)        | 4<br>(36.3)             |
| Rutsaert [24]/<br>Belgium/<br>AspICU          | 7/34<br>(20.5)      | 7 (100)/<br>66 (56-77)                   | Obesity (2),<br>AH (3), DM (3),<br>CVD (1), CKD<br>(1), AML (1),<br>pemphigus (1)    | 8 (5-13)                                          | 5/6 (BAL)<br>1/1 (TA)<br><i>A. fumigatus</i> (5)<br><i>A. flavus</i> (1)<br><br>Positive DE: 4 (BAL)            | 1/6 (serum)/0.8<br>5/6 (BAL)/2.63                                       | -                                                         | -                                              | 0/7                                                    | 6 (85.7)<br>Voriconazole (6)<br>Isavuconazole (2)                   | 4<br>(57.1)             |
| Alanio [11]/<br>France/<br>AspICU<br>Pers.*** | 9/27<br>(33.3)      | 5 (71.4)/<br>63 (50-76)                  | Obesity (3),<br>AH (7), DM (3),<br>CVD (2), CPD<br>(1), myeloma (1),<br>steroids (2) | -                                                 | 5/7 (BAL)<br>2/2 (BAS)<br><i>A. fumigatus</i> (7)                                                               | 1/9 (serum)/0.51<br>2/7 (BAL)/2.4                                       | 3/7 (BAL)<br>1/2 (TA)<br>0/8 (serum)                      | 4/7                                            | 1/9<br>Nodules (1)                                     | 2 (22.2)<br>Voriconazole (1)<br>Caspofungin (1)                     | 4<br>(44.4)             |
| Brown [25]/<br>UK/<br>IAPA                    | 2/62<br>(3.2)       | 2 (100)/<br>33.5                         | AML (1),<br>HSCT (1)                                                                 | -                                                 | 1/2 (TA)<br><i>A. fumigatus</i> (1)                                                                             | 0/2 (serum)<br>2/2 (TA)                                                 | 2/2 (TA)                                                  | 0/2                                            | 0/2                                                    | 2 (100)<br>Posaconazole (1)<br>Itraconazole (1)<br>Caspofungin (1)  | 1<br>(50)               |
| Van Arkel [26]/<br>Netherland/<br>mAspICU     | 6/31<br>(19.4)      | 6 (100)/<br>62 (57-75)                   | CVD (1),<br>CPD (1),<br>Systemic<br>steroids (3).                                    | 5 (3-14)                                          | 2/3 (BAL)<br>2/2 (TA)<br>1/1 (sputum)<br><i>A. fumigatus</i> (5)                                                | -                                                                       | -                                                         | -                                              | 0/6                                                    | 6 (100)<br>Voriconazole (5)<br>Anidulafungin (5)<br>AMB (1)         | 4<br>(66.7)             |
| Nasir [27]/<br>Pakistan/<br>NR                | 5/147<br>(3.4)      | 3 (60)/<br>71 (54-83)                    | AH (3),<br>DM (4)                                                                    | 8 (1-13)                                          | 5/5 (TA)<br><i>A. flavus</i> (3)<br><i>A. niger</i> (1)<br><i>A. fumigatus</i> + <i>A.</i><br><i>flavus</i> (1) | 0/5 (serum)                                                             | -                                                         | 2/5                                            | 0/5                                                    | 5 (100)<br>Voriconazole (3)<br>AMB (2)                              | 3<br>(60)               |

|                                                      |                  |                          |                                                                                                          |            |                                                                                                                                                            |                                    |                            |       |                                                       |                                                                                                     |             |
|------------------------------------------------------|------------------|--------------------------|----------------------------------------------------------------------------------------------------------|------------|------------------------------------------------------------------------------------------------------------------------------------------------------------|------------------------------------|----------------------------|-------|-------------------------------------------------------|-----------------------------------------------------------------------------------------------------|-------------|
| Gangneux [10]/<br>France/<br>AspICU<br>Pers. °       | 7/45<br>(15.6)   | 4 (57.1) /<br>70 (63-75) | Obesity (1),<br>AH (3), DM (2),<br>CKD (1),<br>hemopathy (1),<br>CML (1), SOT(1)                         | -          | 6/7 (RS)<br><i>A. fumigatus</i> (6)                                                                                                                        | 2/7 (serum)                        | 7/7 (RS)<br>3/7 (serum)    | -     | 0/7                                                   | 7 (100)<br>Voriconazole (4)<br>Isavuconazole (3)                                                    | 2<br>(28.6) |
| Falces-Romero<br>[28]/<br>Spain/<br>AspICU-<br>EORTC | 8/5700<br>(0.1)  | 6 (75)/<br>69 (61-72)    | Obesity (2),<br>DM (5), CPD (2),<br>HIV (1),<br>MDS (1),<br>Haemophilia (1),<br>AS (1),<br>Golimumab (1) | 12 (7-21)  | 8/8 (BAS)<br>1/1 (BAL)<br>1/1 (sputum)<br><i>A. fumigatus</i> (9)<br><i>A. nidulans</i> (1)                                                                | 1/2 (serum)/1.97<br>2/2 (BAL)/3    | -                          | -     | 0/10                                                  | 8 (100)<br>Voriconazole (5)<br>Isavuconazole (2)<br>Caspofungin (1)<br>Anidulafungin (1)<br>AMB (5) | 7<br>(87.5) |
| Zhang [29]/<br>China/<br>NR                          | 3/38<br>(7.9)    | -                        | -                                                                                                        | -          | 3/NR (RS)<br>2 <i>Aspergillus</i> spp.<br><i>A. fumigatus</i>                                                                                              | -                                  | -                          | -     | -                                                     | -                                                                                                   | -           |
| White [30]/<br>UK/<br>CAPA                           | 25/135<br>(18.5) | -                        | Obesity (6),<br>AH (8), DM (6),<br>CVD (1), CPD<br>(12), CKD (2),<br>cancer (6)                          | 8 (0-35)   | 12/12 (BAL)<br><i>A. fumigatus</i> (11)<br><i>A. versicolor</i> (1)                                                                                        | 2/4 (serum)/2.9<br>17/19 (BAL)/5.6 | 14(14 (BAL)<br>5/5 (Serum) | 13/14 | 12/25<br>Nodules (7)<br>Cavity (5)<br>Fungus ball (1) | 18 (72)<br>Voriconazole (14)<br>Fluconazole (2)<br>Caspofungin (2)<br>Anidulafungin (2)<br>AMB (5)  | 13<br>(52)  |
| Ichai [31]/<br>France/<br>NR                         | 6/26<br>(23.1)   | -/<br>64 (mean)          | -                                                                                                        | 6.5 (mean) | -                                                                                                                                                          | -                                  | -                          | -     | -                                                     | 6 (100)<br>Voriconazole (1)<br>Isavuconazole (5)                                                    | 2<br>(33.3) |
| Sarrazyn [32]/<br>Belgium/<br>AspICU                 | 4/131<br>(3.1)   | 3 (75)/<br>75 (69-89)    | Obesity (2),<br>CKD (1)                                                                                  | 4          | 4/4 (BAL)<br><i>Aspergillus</i> spp. (4)                                                                                                                   | 4/4 (BAL)                          | 2/4 (BAL)                  | -     | 0/4                                                   | 3 (75)<br>Voriconazole (2)<br>AMB (1)                                                               | 4<br>(100)  |
| Dupont [33]/<br>France/<br>AspICU<br>Pers. °°        | 19/106<br>(17.9) | 15 (79)/<br>69 (62-73)   | Obesity (1),<br>AH (7), DM (7),<br>CVD (1), CPD<br>(8), cancer (4),<br>CKD (2), HIV<br>(1), HBV (1)      | 10 (7-15)  | 7/8 (BAL)<br>6/6 (BAS)<br>3/4 (TA)<br><i>A. fumigatus</i> (14)<br><i>A. niger</i> (1)<br><i>A. calidoustus</i> (1)<br><br>Positive DE:<br>2 (BAL) + 1 (TA) | 5/9 (BAL)/1.57                     | -                          | -     | 3/19<br>Nodules (2)<br>Cavity (2)                     | 9 (47.3)<br>Voriconazole (9)<br>Caspofungin (1)                                                     | 7<br>(36.8) |
| Mitaka [34]/<br>USA/<br>AspICU                       | 4/7<br>(57.1)    | 4 (100)/<br>78 (77-80)   | AH (1), DM (1),<br>CVD (2),CPD<br>(1), cancer (2)                                                        | 10 (8-12)  | 4/4 (BAL)<br><i>A. fumigatus</i> (4)                                                                                                                       | 1/4 (serum)                        | -                          | -     | 1/4<br>Cavity (1)<br>Air-crescent (1)                 | 4 (100)<br>Voriconazole (3)<br>Caspofungin (1)                                                      | 4<br>(100)  |
| Borman [35]/<br>UK/<br>AspICU<br>Pers. °°°           | 15/61<br>(24.6)  | 9 (60)/<br>57 (48-66)    | -                                                                                                        | -          | 2/4 (BAL)<br>2/3 (TA)<br>1/1 (sputum)<br><i>A. fumigatus</i> (5)<br><br>Positive DE: 1 (BAL)                                                               | 5/15 (serum)/1.7<br>4/5 (BAL)/5.2  | 2/3 (BAL)<br>1/8 (serum)   | 12/15 | -                                                     | -                                                                                                   | -           |

[illegible]

|                                                        |                 |                          |                                                                                |                |                                                                                       |                                             |                                      |      |                                                   |                                                                                 |              |
|--------------------------------------------------------|-----------------|--------------------------|--------------------------------------------------------------------------------|----------------|---------------------------------------------------------------------------------------|---------------------------------------------|--------------------------------------|------|---------------------------------------------------|---------------------------------------------------------------------------------|--------------|
| Fekkar [45]/<br>France/<br>EORTC                       | 6/260<br>(2.3)  | 5 (83.3)/<br>56 (49-72)  | Obesity (5),<br>AH (5), DM (1),<br>SOT (3)                                     | 10 (6-42)      | 3/4 (BAL)<br>2/2 (TA)<br><i>A. fumigatus</i> (3)                                      | 1/6 (serum)/1.19<br>2/5 (BAL)/1.5           | 2/2 (TA)<br>2/2 (BAL)<br>2/6 (Serum) | 2/6  | -                                                 | 5 (83.3)<br>Voriconazole (5)<br>Isavuconazole (5)<br>Caspofungin (5)<br>AMB 82) | 4<br>(66.7)  |
| Gouzien [46]/<br>France/<br>mAspICU                    | 2/53<br>(3.8)   | -                        | -                                                                              | -              | 2/53 <i>Aspergillus</i> spp.<br>(1 BAL, 1 TA)                                         | 1/53 (serum)                                | -                                    | -    | -                                                 | 1                                                                               | -            |
| Van Grootveld<br>[47]/<br>Netherlands/<br>ECMM         | 11/63<br>(17.5) | 14 (73.7)/<br>65 (59-72) | AH (6),<br>DM (5), CVD (3),<br>CPD (7), PT (2),<br>cancer (1)                  | 17<br>(14-21)& | 3/11 (BAL)<br>4/8 (TA)<br><i>A. fumigatus</i> (7)                                     | 10/11 (BAL)/4.4                             | 6/11 (BAL)<br>7/8 (BAS)              | -    | -                                                 | 9 (47.4)<br>AMB (9)<br>Voriconazole (5)                                         | 10<br>(52.6) |
| Positive DE: 1 (BAL)                                   |                 |                          |                                                                                |                |                                                                                       |                                             |                                      |      |                                                   |                                                                                 |              |
| Maes [48]/<br>UK/<br>IAPA                              | 3/94<br>(3.2)   | -                        | -                                                                              | -              | 0/3 (BAL)                                                                             | 3/3 (BAL)/1                                 | 1/3 (BAL)                            | -    | -                                                 | 3 (100)<br>AMB (3)                                                              | 2<br>(66.7)  |
| Meijer [49]/<br>Netherlands/<br>ECMM                   | 13/66<br>(19.7) | 10 (76.9)/<br>68 (62-74) | AH (2),<br>DM (3), CVD (7),<br>CPD (1), UC (2),<br>CKD (1)                     | -              | 8/8 (BAL)<br>5/5 (TA)<br><i>A. fumigatus</i> (13)                                     | 0/6 (serum)<br>4/5 (TA) + 2/12<br>(BAL)/4.5 | 4/5 (BAL)<br>2/2 (TA)                | 1/1  | 2/13<br>Nodules (1)<br>Cavity (1)                 | 13 (100)<br>Voriconazole (13)<br>Caspofungin (5)<br>AMB (5)                     | 6<br>(46.1)  |
| Van Biesen<br>[50]/<br>Netherlands/<br>Personal \$\$\$ | 9/42<br>(21.4)  | 6 (66.7)/<br>73 (65-75)  | Obesity (8),<br>AH (3), DM (1),<br>CPD (4), SOT<br>(1), chronic<br>steroid (1) | 3 (1-5)        | 7/9 (BAL)<br><i>A. fumigatus</i> (5)<br><i>A. flavus</i> (1)<br><i>A. terreus</i> (1) | 9/9 (BAL)/4                                 | -                                    | -    | 0/9                                               | 9 (100)<br>Voriconazole (9)<br>AMB (9)                                          | 2<br>(22.2)  |
| Obata [51]/<br>USA/<br>NR                              | 4/226<br>(1.8)  | -                        | -                                                                              | -              | -                                                                                     | -                                           | -                                    | -    | -                                                 | -                                                                               | -            |
| Razazi [52]/<br>France/<br>mAspICU-<br>IAPA            | 7/90<br>(7.8)   | -                        | -                                                                              | 6 (5-11)       | 4/24 (BAL)<br><i>Aspergillus</i> spp. (4)                                             | 5/88 (serum)                                | -                                    | 9/88 | -                                                 | -                                                                               | -            |
| Positive DE: 2 (BAL)                                   |                 |                          |                                                                                |                |                                                                                       |                                             |                                      |      |                                                   |                                                                                 |              |
| Ripa [2]/<br>Italy/AspICU<br>Pers. ^^^                 | 11/731<br>(1.5) | -                        | -                                                                              | -              | 8/NR (4 BAL, 4 BAS)<br><i>A. fumigatus</i> (7)<br><i>A. terreus</i> (1)               | 6/NR (BAL)                                  | -                                    | -    | -                                                 | -                                                                               | -            |
| Pintado [53]/<br>Mexico/<br>ECMM                       | 16/83<br>(19.3) | 11 (68.8)/<br>64 (mean)  | Obesity (6),<br>AH (4), DM (5),<br>CPD (1),<br>cancer (3)                      | 6 (4-9)        | 2/16 (BAL)<br><i>A. fumigatus</i> (2)                                                 | 7/16 (serum)<br>9/16 (BAL)                  | -                                    | -    | -                                                 | -                                                                               | 5<br>(31.3)  |
| Versych [54]/<br>France/<br>IAPA                       | 2/54<br>(3.7)   | 2 (100)/<br>63.5         | AH (1), DM (1)                                                                 | 6.5            | 1/1 (BAL)<br>1/1 (TA)<br><i>A. fumigatus</i> (2)                                      | 2/2 (serum)/2.34<br>1/2 (BAL)/2.46          | -                                    | 2/2  | 2/2<br>Cavity (2)<br>Nodules (1)<br>Halo sign (1) | 2 (100)<br>Voriconazole (2)                                                     | 2<br>(100)   |
| Negative DE:<br>1 (BAL)                                |                 |                          |                                                                                |                |                                                                                       |                                             |                                      |      |                                                   |                                                                                 |              |

|                                                       |                 |                         |                                                         |            |                                                                                                                |                                    |            |     |                                  |                                                                                |             |
|-------------------------------------------------------|-----------------|-------------------------|---------------------------------------------------------|------------|----------------------------------------------------------------------------------------------------------------|------------------------------------|------------|-----|----------------------------------|--------------------------------------------------------------------------------|-------------|
| Reizine [55]/<br>France/<br>ECMM                      | 10/49<br>(20.4) | 6 (60)/<br>72 (57-77)   | Obesity (1), DM<br>(2), CKD (1),<br>CML (1), SOT<br>(1) | 6 (3-12)   | 8/10 (BAS)<br>1/10 (sputum)<br><i>A. fumigatus</i> (9)                                                         | 3/10 (serum)<br>4/10 (BAS)         | 9/10 (BAS) | -   | Wedge-cons. (7)<br>Halo sign (1) | 8 (80)<br>Voriconazole (6)<br>Isavuconazole (4)                                | 4<br>(40)   |
| Oliva [56]/<br>Italy/<br>mAspICU-<br>IAPA             | 2/55<br>(3.6)   | 2 (100)/<br>48.5        | Obesity (1)                                             | -          | 0/2 (RS)                                                                                                       | 2/2 (RS)/2.3                       | -          | -   | 0/2                              | -                                                                              | 0           |
| Campochiaro<br>[57]/Italy/<br>NR                      | 1/65<br>(1.5)   | 1 (100)/<br>68          | -                                                       | -          | 1/1 (BAL)<br><i>A. terreus</i> (1)                                                                             | -                                  | -          | -   | -                                | 1 (100)<br>Voriconazole (1)                                                    | 1<br>(100)  |
| Wasylyshyn<br>[58]/<br>USA/ECMM                       | 3/256<br>(1.2)  | 2 (66.7)/<br>67         | Obesity (2),<br>AH (2), DM (1),<br>epilepsy (1)         | 13 §§      | 2/3 (TA)<br><i>A. fumigatus</i> (2)                                                                            | 1/2 (serum)/3.1<br>1/1 (BAL)/1.4   | -          | -   | 2/3<br>Cavity (2)                | 2 (66.7)<br>Voriconazole (2)<br>Isavuconazole (1)<br>Micafungin (1)<br>AMB (1) | 1<br>(33.3) |
| Nebreda-<br>Mayoral [59]/<br>Spain/<br>NR             | 3/712<br>(0.4)  | -                       | -                                                       | -          | 3/3 (BAS)<br><i>A. fumigatus</i> (2)<br><i>A. niger</i> (1)                                                    | -                                  | -          | -   | -                                | 3 (100)<br>Voriconazole (2)<br>Isavuconazole (2)                               | 2<br>(66.7) |
| Signorini [60]/<br>Italy/<br>EORTC                    | 2/92<br>(2.2)   | -                       | -                                                       | -          | 2/NR<br><i>Aspergillus</i> spp. (2)                                                                            | -                                  | -          | -   | -                                | -                                                                              | -           |
| Rabagliati [61]/<br>Chile/<br>ECMM                    | 14/146<br>(9.6) | 8 (57.1)/<br>65 (55-73) | Obesity (3),<br>AH (7),<br>DM (2),<br>CPD (4)           | 15 (10-23) | 7/14 (TA)<br><i>A. niger</i> (4)<br><i>A. fumigatus</i> (3)<br><i>A. terreus</i> (1)<br><i>A. lentulus</i> (1) | 6/14 (serum)/1.2<br>2/14 (BAL)/4.6 | -          | -   | 1/13<br>Cavity (1)               | 11 (78.6)<br>Voriconazole (10)<br>AMB (1)                                      | 4<br>(28.6) |
| Lamoth [62]/<br>Switzerland/<br>mAspICU<br>pers. \$\$ | 3/118<br>(2.5)  | 3 (100)/<br>62 (mean)   | Obesity (2), A<br>H (2), DM (1),<br>CPD (1)             | 7 (3-8)    | 3/3 (TA)<br><i>A. fumigatus</i> (3)                                                                            | 1/3 (serum)/0.73                   | 1/3 (TA)   | 1/3 | 0/3                              | 3 (100)<br>Voriconazole (3)                                                    | 1 (33.3)    |
| Yang [63]/<br>China/<br>NR                            | 2/52<br>(3.8)   | -                       | -                                                       | -          | 2/NR (RS)<br><i>A. fumigatus</i> (1)<br><i>A. flavus</i> (1)                                                   | -                                  | -          | -   | -                                | -                                                                              | -           |

Data are absolute number (percentage) unless otherwise specified.

**Abbreviations.** DE, direct examination of respiratory sample showing septate branching hyphae; AH, arterial hypertension; DM, diabetes mellitus; CVD, cardiovascular disease; CPD, chronic pulmonary disease; SOT, solid organ transplant; ICU, intensive care unit; IQR, interquartile range; TI, tracheal intubation; ODI, optical density index; BDG, (1,3)-beta-D-glucan; BAL, bronchial alveolar lavage; TA, tracheal aspirate; BAS, bronchial aspirate; CKD, chronic kidney disease; AML, acute myeloid leukaemia; HSCT, haematopoietic stem cell transplantation; CML, chronic myeloid leukaemia; HIV; human immunodeficiency virus; MDS, myelodysplastic syndrome; AS, ankylosing spondylitis; CLL, chronic lymphocytic leukaemia; PT, pulmonary thromboembolism; UC, ulcerative colitis; RS, respiratory specimen, AMB, amphotericin B.

\* Modified AspICU algorithm with the addition that positive galactomannan GM ( $\geq 1$ ) from BAL or TA, or two consecutively but separately drawn positive serum samples ( $\geq 1$ ) were accepted as entry criterion.

\*\* Putative IPA was assumed in one of the following conditions: cultural growth of *Aspergillus* spp from BAL specimens.; GM optical density index (ODI) >0.5 in serum, GM ODI >1 in respiratory tract specimen from BAL. Clinical signs and radiological signs were in line with the modified AspICU score and CAPA definitions.

\*\*\* Putative IPA was considered if *Aspergillus* spp were identified in BAL culture; or if two of the following conditions were met (ie, presence of *Aspergillus* spp in bronchial aspiration (BAS) culture; positive *Aspergillus fumigatus* qPCR in BAL, BA, or serum; galactomannan ODI >0.8 in BAL; GM ODI >0.5 in serum; and  $\beta$ -D-glucan >80 pg/mL in serum).

° putative IA: AspICU algorithm which includes PCR together with culture; probable IA: putative IA + one positive blood biomarker (GM and/or PCR).

°° AspICU algorithm plus BAL GM results; COVID-19 considered as a risk factor.

°°° modified AspICU algorithm incorporating PCR, serology, and angioinvasion biomarkers as proposed by Gangneux.

^ modified AspICU algorithm by Schauwvlieghe, considering a positive serum GM or *Aspergillus* spp. growth from a TA, since bronchoscopies were not performed at Authors' institution due to safety concerns for healthcare workers.

^^ Probable CAPA: presence of new cavitary lung lesion(s) on chest CT without alternative explanation, positive serum GM EIA index  $\geq 0.5$ , positive BAL GM index  $\geq 1.0$ , or positive culture for *Aspergillus* species in BAL. Possible CAPA: positive BAL GM index 0.5 – 1.0; positive serum BDG  $\geq 80$  pg/ml without alternative explanation; or culture with growth of *Aspergillus* species in TA.

^^^ AspICU algorithm plus serum or BAL GM index.

\$ AspICU by Blot, IAPA by Schauwvlieghe and EORTC algorithm.

\$\$ mAspICU by Verweij. Results of BAS cultures were also considered for defining a putative IPA category (*Aspergillus* spp. recovered from culture of  $\geq 2$  consecutive BAS in the absence of bronchoscopy and BAL sample).

\$\$\$ AspICU algorithm without the host risk factor+ BAL GM index.

§ In CAPA non-survivors; median was 4.6 days in CAPA-survivors.

§§ Median days since COVID-diagnosis to CAPA.

& Median days since symptoms onset to CAPA.
