# Supplementary material for: Invasive Fungal Infections Complicating COVID-19: A Narrative Review
Source: J Fungi (Basel). 2021 Oct 29;7(11):921. doi: 10.3390/jof7110921 (PMC8620819; doi:10.3390/jof7110921)
Supplement: Supplementary file 1 [file jof-07-00921-s001.zip]

Archive with 5 entries (5 files):
- tables/Table S1_CAPA reports.pdf
- tables/Table S2_CAPA studies.pdf
- tables/Table S3_CAPA diagnostic criteria.pdf
- tables/Table S4 S5_Candida reports and studies.pdf
- tables/Table S6 S7_Mucor reports and studies.pdf
